## Retraction: Berberine and cinnamaldehyde together prevent lung carcinogenesis

Mingjing Meng<sup>1,\*</sup>, Shengnan Geng<sup>1,\*</sup>, Zhenhua Du<sup>1</sup>, Jingjing Yao<sup>1</sup>, Yaqiu Zheng<sup>1</sup>, Zibo Li<sup>1</sup>, Zhenzhen Zhang<sup>2</sup>, Jiahuan Li<sup>1</sup>, Yongjian Duan<sup>2</sup> and Gangjun Du<sup>1,2</sup>

<sup>1</sup>Institute of Pharmacy, Pharmacy College of Henan University, Jinming District, Kaifeng, Henan Province 475004, China

<sup>2</sup>Department of Oncology, The First Hospital Affiliated to Henan University, Kaifeng, Henan Province 475001, China

\*These authors contributed equally to this work

**Published:** August 05, 2024

**Copyright:** © 2024 Meng et al. This is an open access article distributed under the terms of the [Creative Commons Attribution License](#) (CC BY 4.0), which permits unrestricted use, distribution, and reproduction in any medium, provided the original author and source are credited.

**This article has been retracted:** This article contains duplicated tumor images found in previously published papers, and some overlaps of IHC images (Figure 5) and wound healing images (Figure 8) representing different experimental conditions. Specifically, an tumor image in Figure 1C also appears in Figure 1C of an earlier published paper [1]. A second tumor image in Figure 1C is also duplicated in Figure 2C of a second earlier paper [2]. Therefore, the Editorial decision was made to retract this paper. All authors agreed with the decision.

Original article: Oncotarget. 2017; 8:76385–76397. <https://doi.org/10.18632/oncotarget.20059>

### REFERENCES

1. Cao N, Ma X, Guo Z, Zheng Y, Geng S, Meng M, Du Z, Lin H, Duan Y, Du G. Oral kanglaite injection (KLTI) attenuates the lung cancer-promoting effect of high-fat diet (HFD)-induced obesity. *Oncotarget*. 2016; 7:61093–106. <https://doi.org/10.18632/oncotarget.11212>. [PubMed]
2. Geng S, Zheng Y, Meng M, Guo Z, Cao N, Ma X, Du Z, Li J, Duan Y, Du G. Gingerol Reverses the Cancer-Promoting Effect of Capsaicin by Increased TRPV1 Level in a Urethane-Induced Lung Carcinogenic Model. *J Agric Food Chem*. 2016; 64:6203–11. <https://doi.org/10.1021/acs.jafc.6b02480>. [PubMed]
